# Supplementary material
Source: PubMed Central journal article supplement (PMC10873123)
Supplement: NIHMS1933448-supplement-MMC1.pdf [file NIHMS1933448-supplement-MMC1.pdf]

**Molecular Cell, Volume 83**

**Supplemental information**

***N*<sup>6</sup>-methyladenosine in 7SK small nuclear RNA**

**underlies RNA polymerase II**

**transcription regulation**

**Yuzhi Wang, Conner M. Traugot, Jodi L. Bubenik, Tianqi Li, Peike Sheng, Nicholas M. Hiers, Paul Fernandez, Lu Li, Jiang Bian, Maurice S. Swanson, and Mingyi Xie**

**Figure S1**

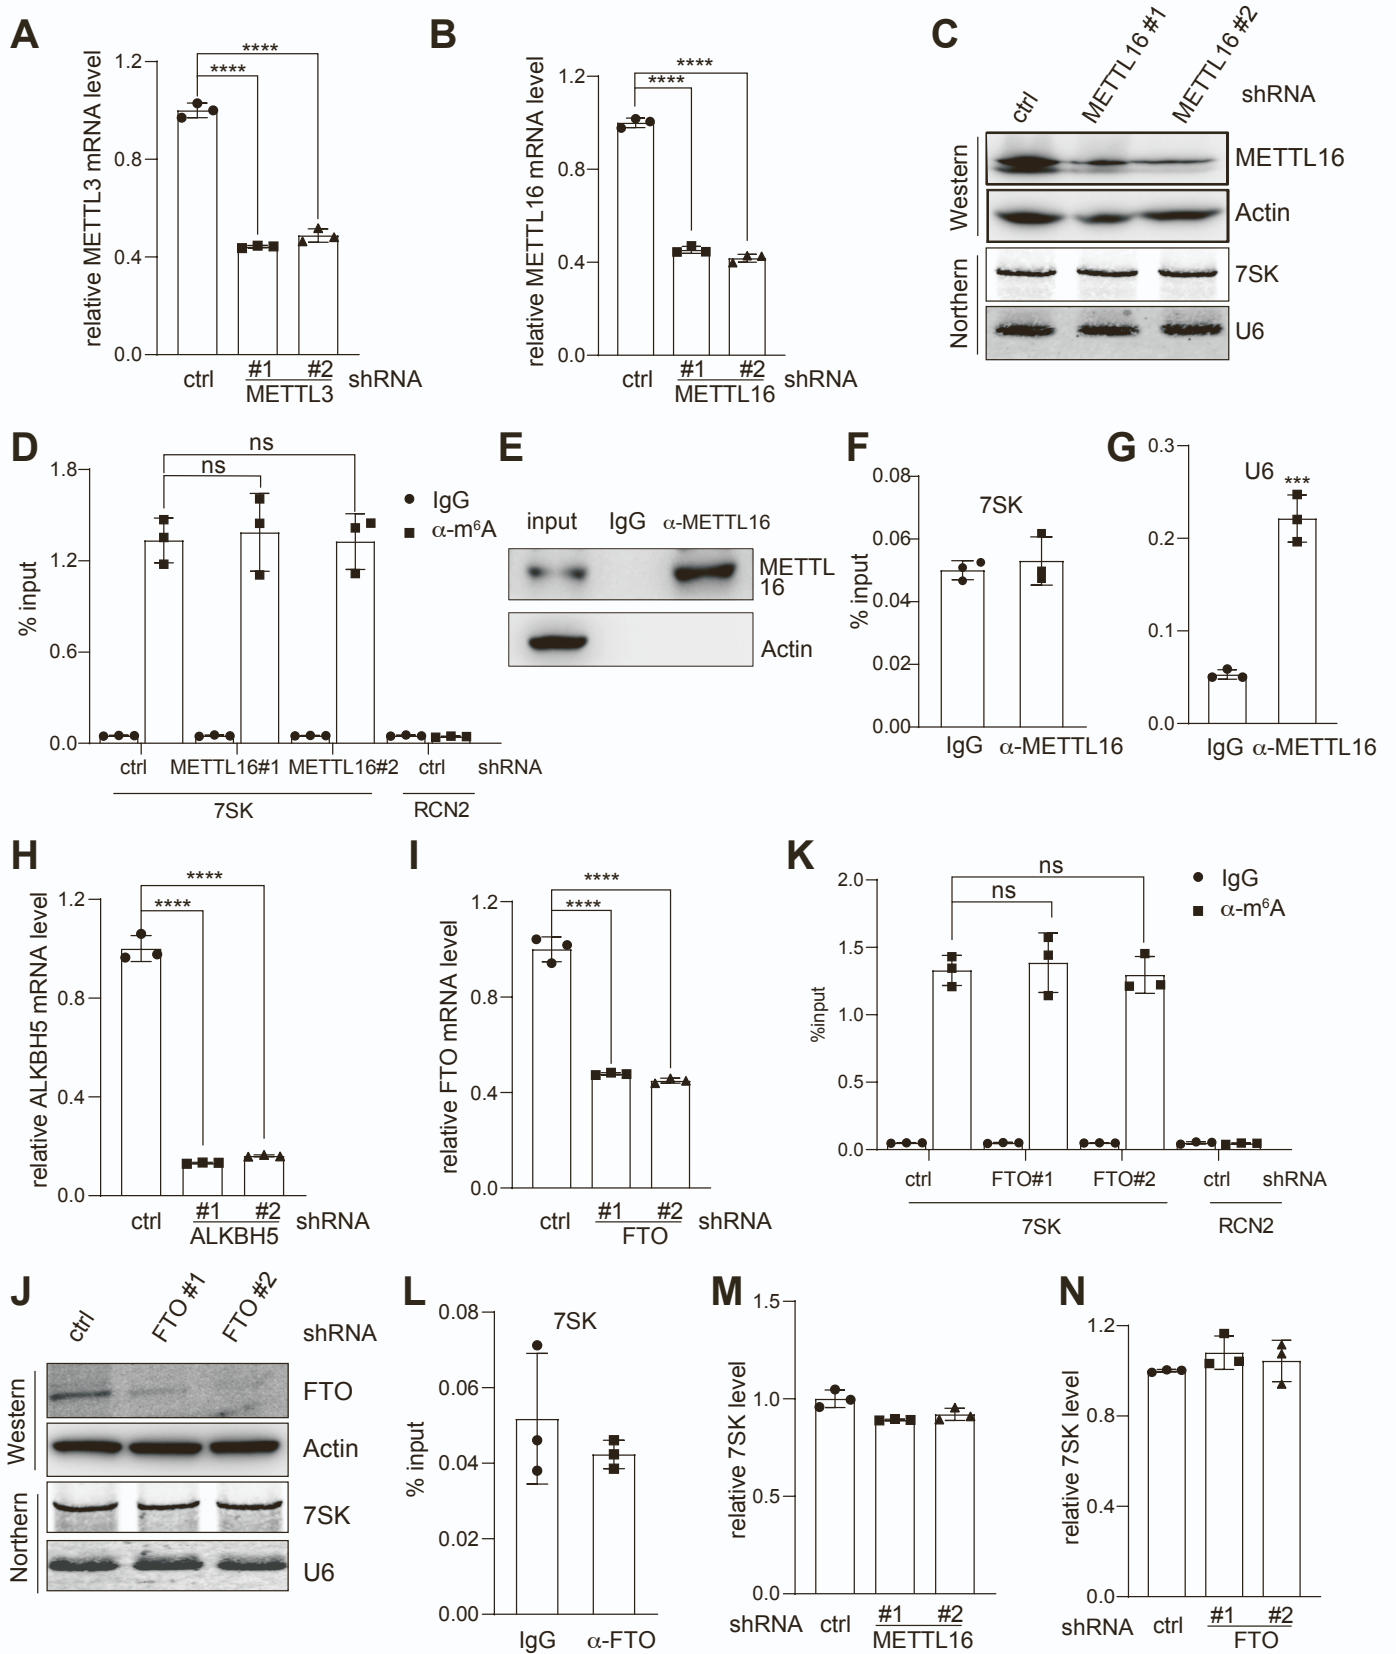

**Figure S2**

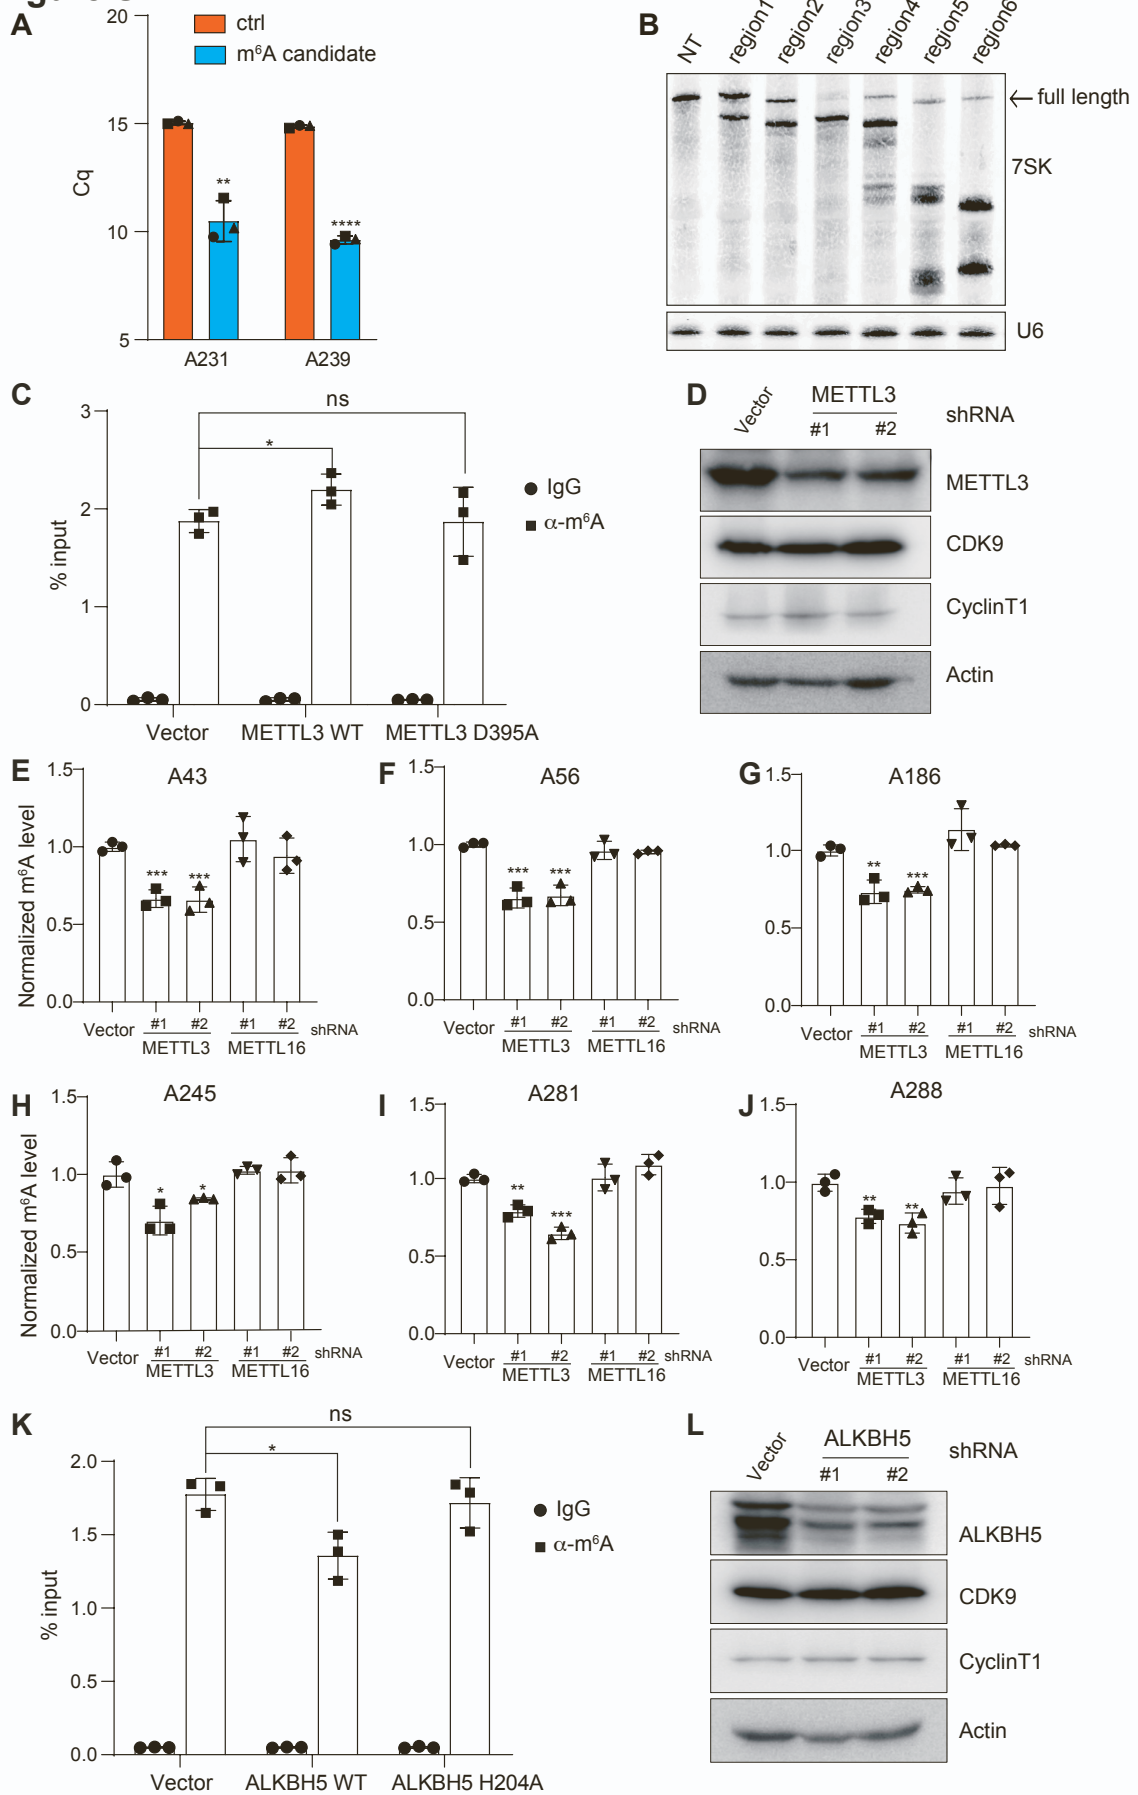

**Figure S3**

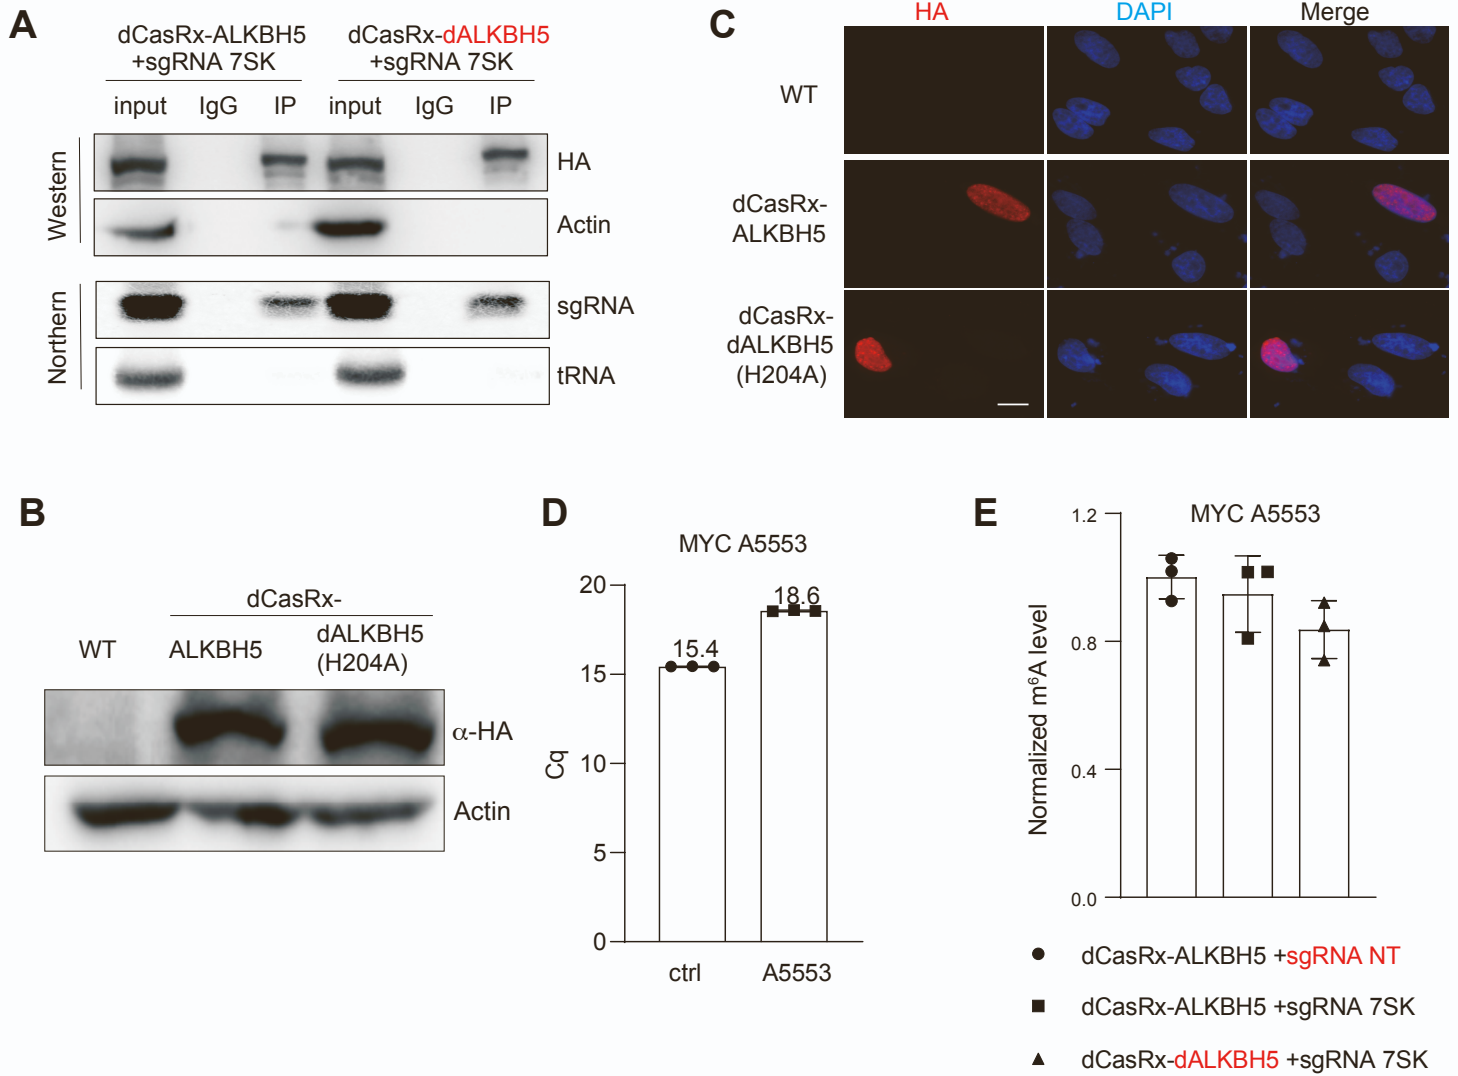

**Figure S4**

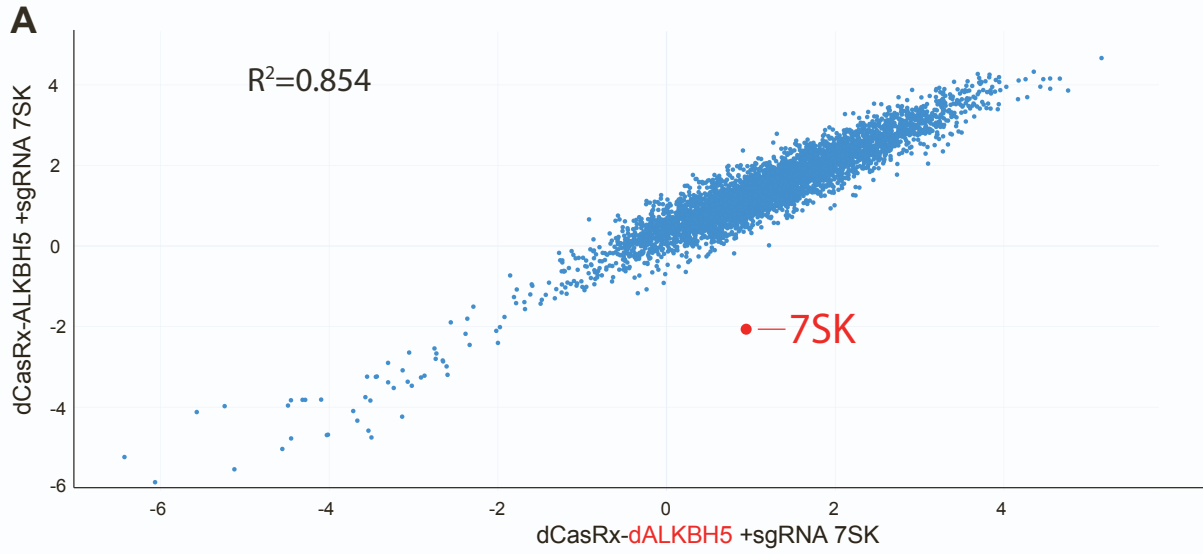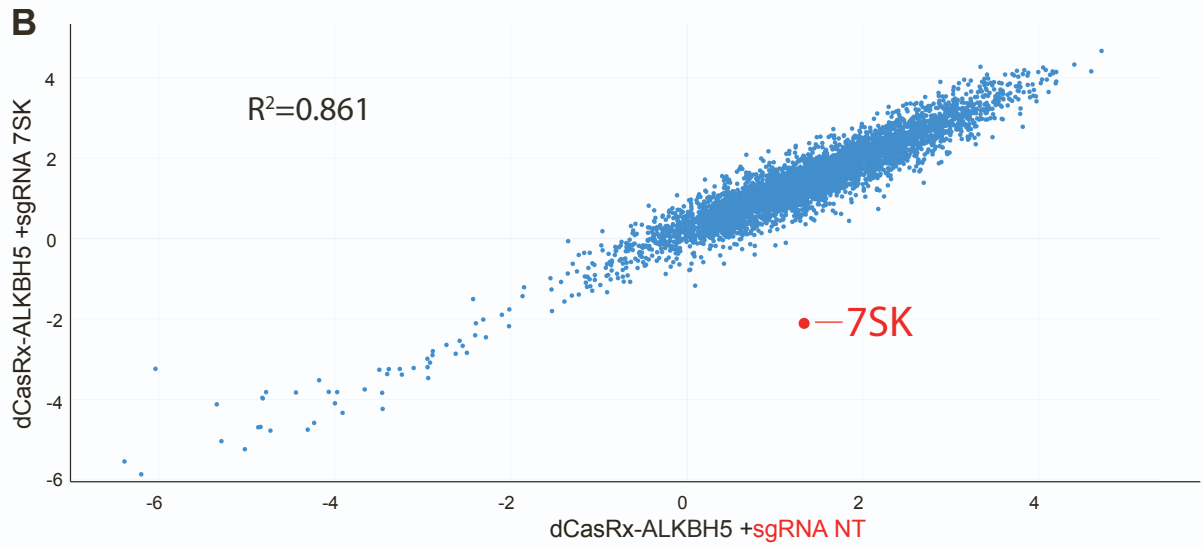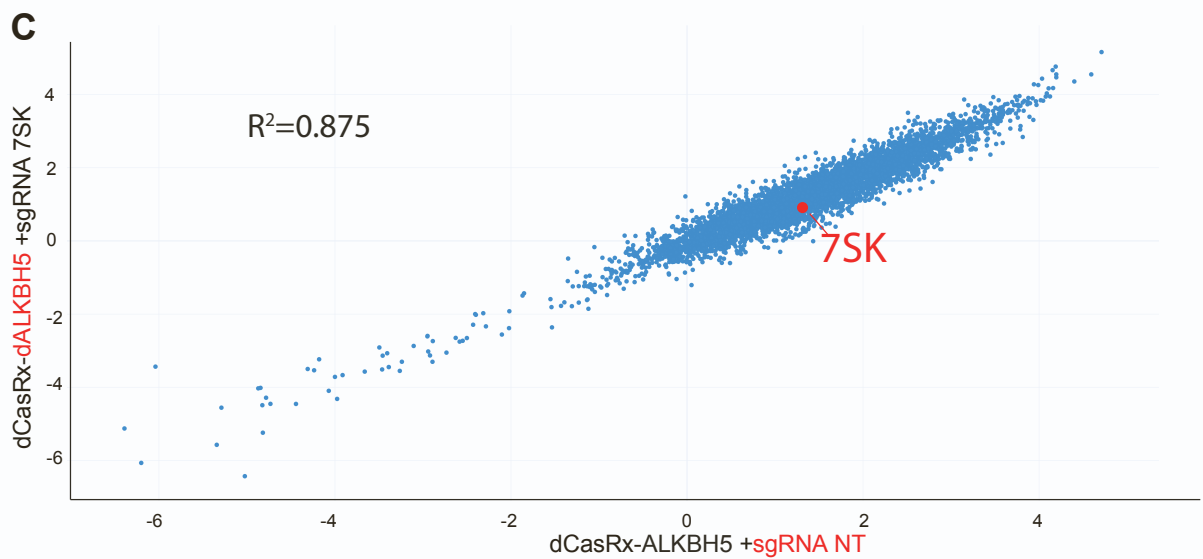

**Figure S5**

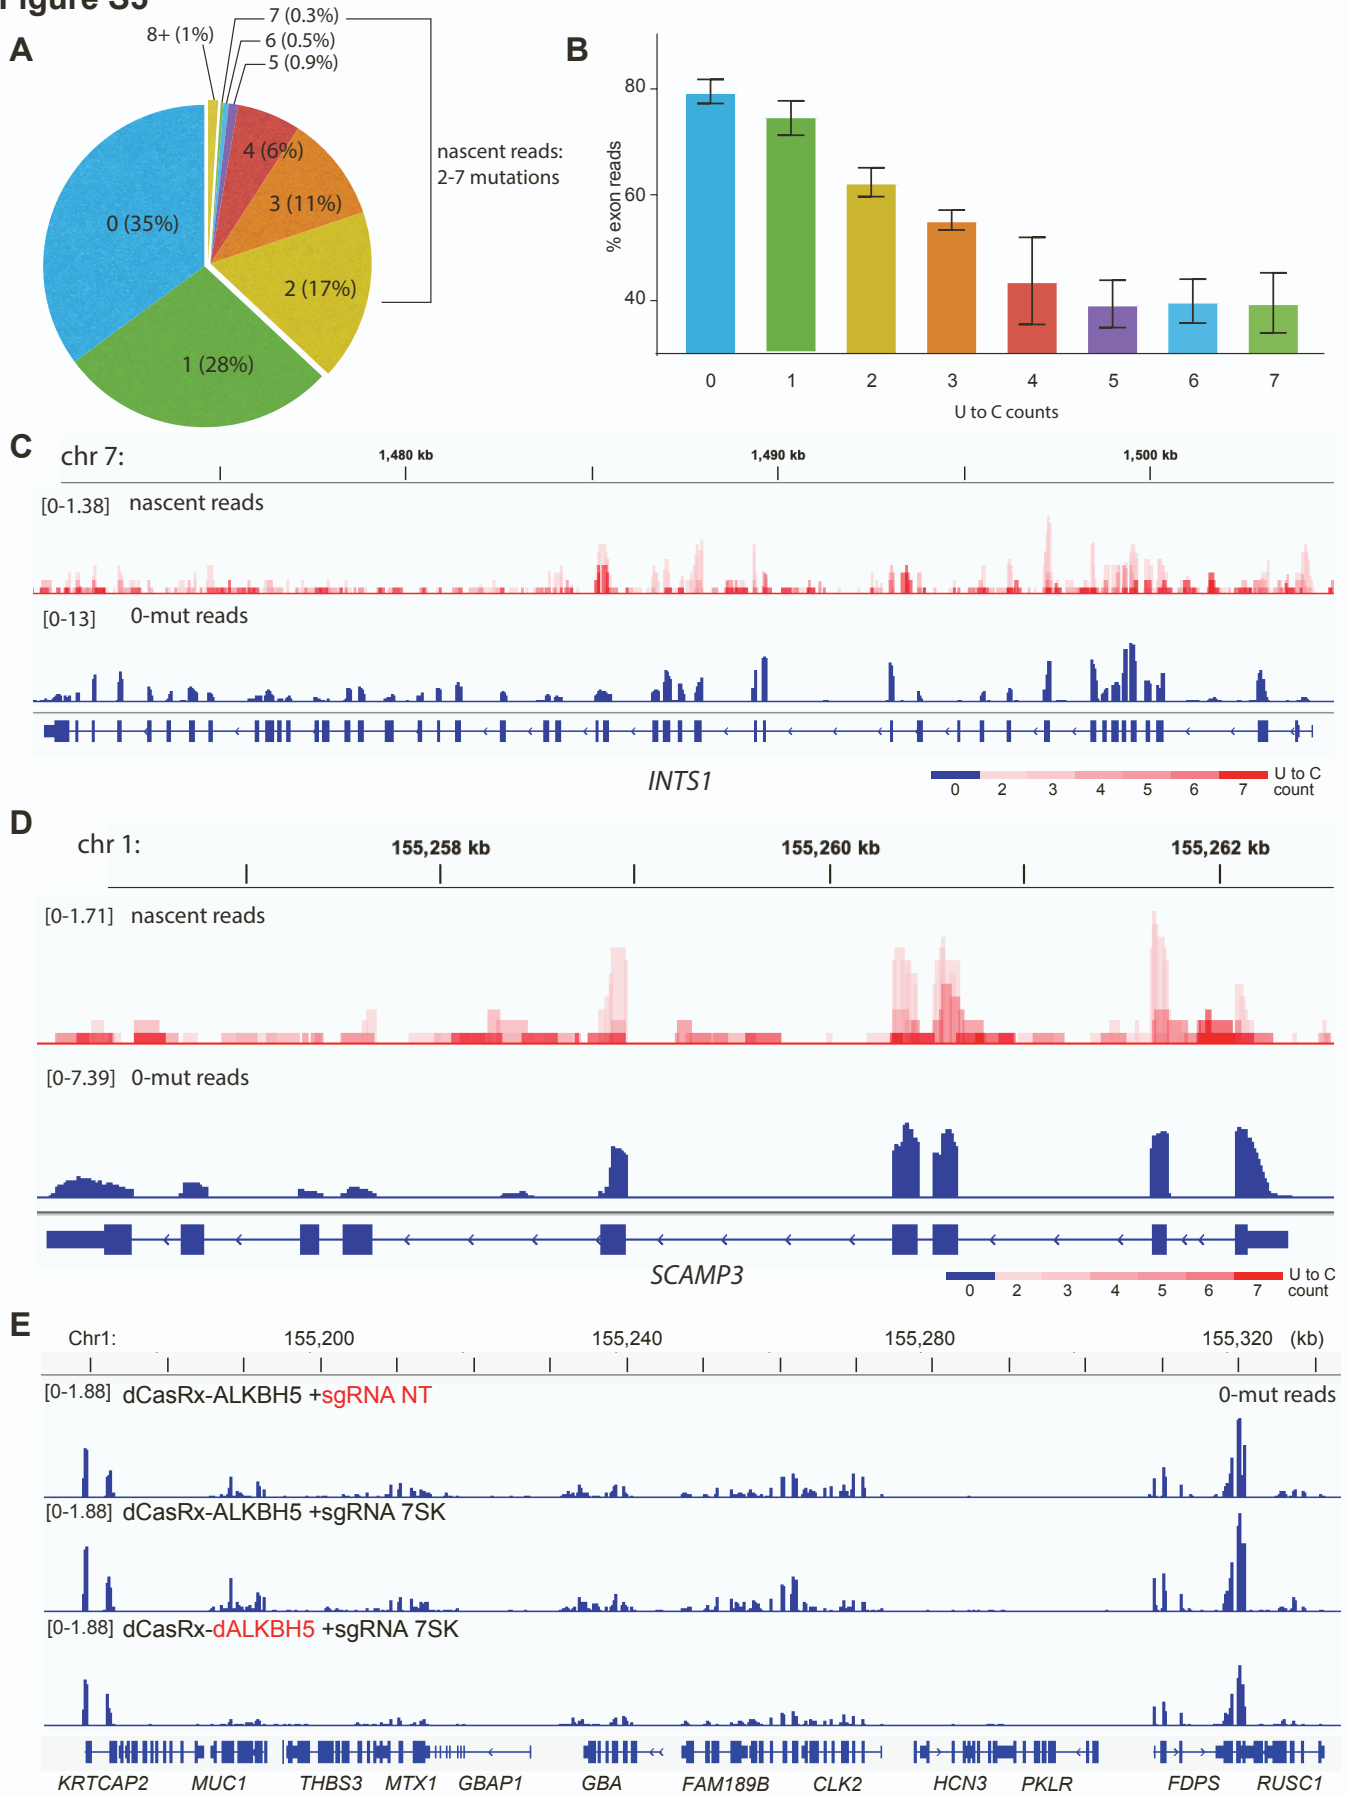

**Figure S6**

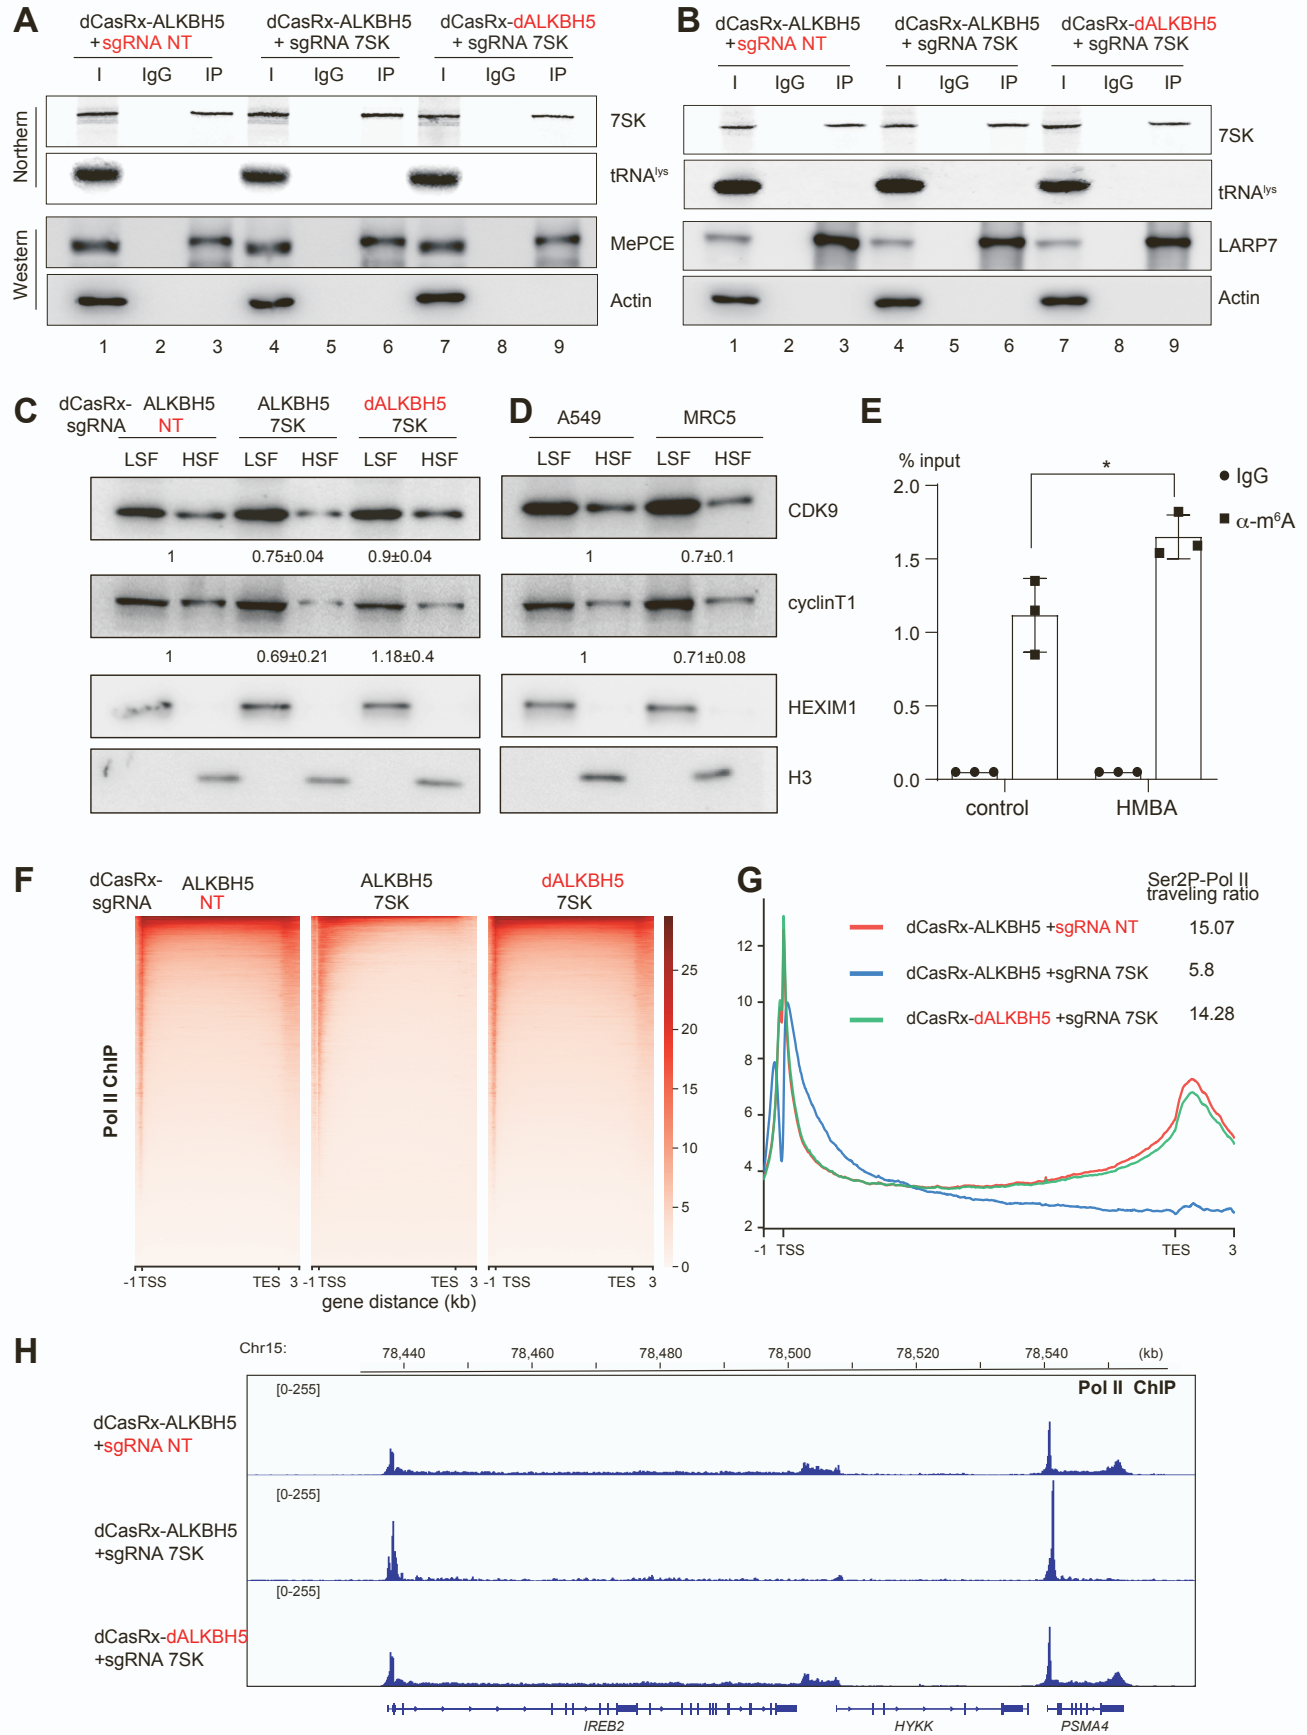

**Figure S7**

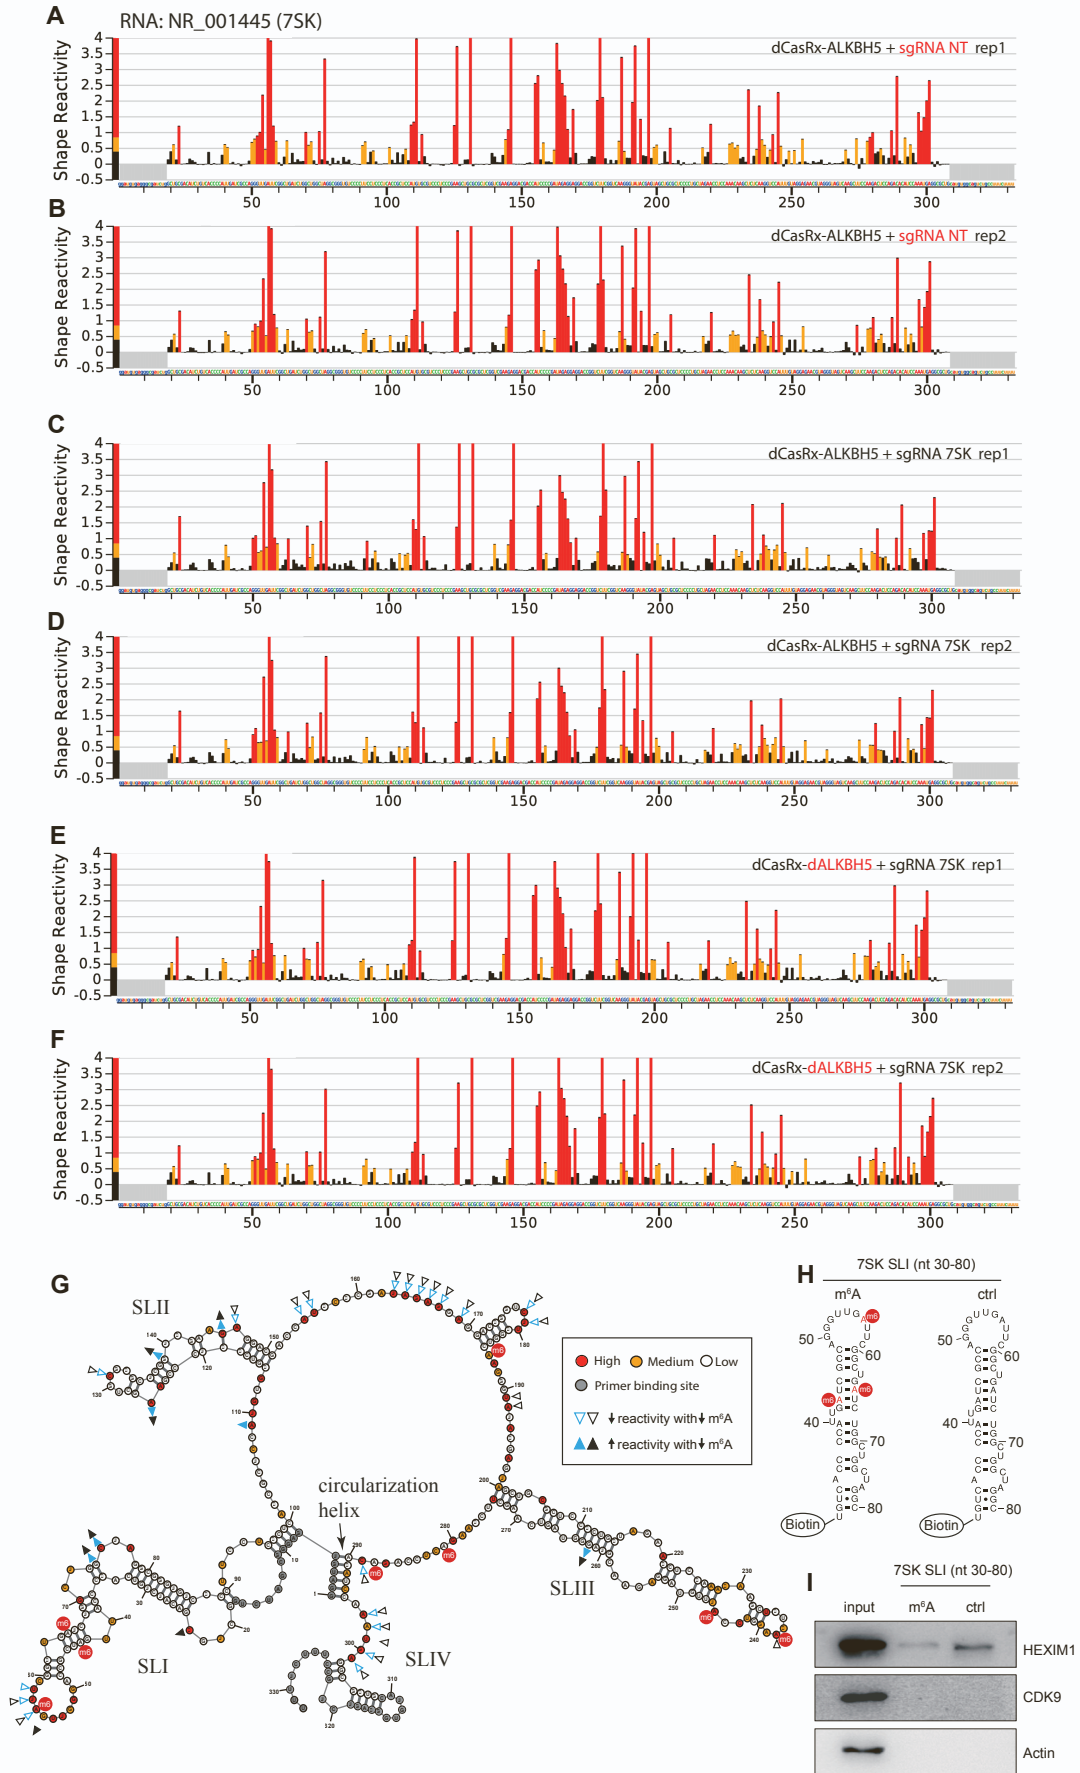



## Supplementary Figure Legends

**Supplementary Figure S1. m<sup>6</sup>A modification of 7SK was not affected by METTL16 or FTO, related to Figure 1.** RT-qPCR analysis showing the mRNA knockdown of METTL3 (A), METTL16 (B), ALKBH5 (H) and FTO (I) using two different shRNAs stably expressed in A549 cells. Western and northern blots show the abundance of 7SK in A549 cells with METTL16 (C) or FTO (J) knockdown, with Actin and U6 as loading controls. MeRIP experiments were performed in METTL16 (D) or FTO (K) knockdown A549 cells, followed by RT-qPCR detection of 7SK and RCN2. RIP analyses were performed in A549 cell lysates using METTL16 (E-G) or FTO (L) specific antibodies, followed by RT-qPCR detection of 7SK and U6. RT-qPCR assays detect the abundance of 7SK relative to U6 in A549 cells with METTL16 (M) or FTO (N) depletion. All the error bars represent SD from three experiments. *t*-test statistics are used, \*\*\**P*<0.001, \*\*\*\**P*<0.0001; ns, not significant.

**Supplementary Figure S2. Validation of m<sup>6</sup>A candidates, accessible regions on 7SK and m<sup>6</sup>A-7SK writer/eraser, related to Figures 2-4.** (A) SELECT analyses of two candidate 7SK m<sup>6</sup>A sites identified by the nanopore sequencing (error bars represent SD; paired *t* test statistics are used, \*\**P*<0.01, \*\*\*\**P*<0.0001). (B) Endogenous RNase H cleavage assays were performed with A549 cell lysate with the addition of DNA oligonucleotides that match the putative accessible regions 1-6 as shown in Figure 2A. Total RNAs were extracted after RNase H assay and northern blot was performed to detect 7SK and U6 snRNAs. Full length 7SK is indicated with an arrow. MeRIP experiments were performed in METTL3 (C) or ALKBH5 (K) overexpression cells by plasmid transfection, followed by RT-qPCR detection of 7SK. Western blots of METTL3 (D) or ALKBH5 (L) in A549 cells stably expressing shRNA against these proteins. CDK9 and CyclinT1 levels are also detected, with Actin as a loading control. (E-J) SELECT analyses of six 7SK m<sup>6</sup>A sites were compared in METTL3 and METTL16 knockdown cells. Error bars represent SD; *t*-test statistics are used, \* *P*<0.05; \*\**P*<0.01 and \*\*\**P*<0.001, ns, not significant.

**Supplementary Figure S3. dCasRx-ALKBH5 fusion proteins expression levels, subcellular localization and detection of m<sup>6</sup>A at MYC A5553, related to Figure 4.** (A) Western and northern blots detect the dCasRx-ALKBH5 fusion protein level and the interaction of sgRNA with dCasRx-ALKBH5/dCasRx-dALKBH5. (B) Western blots demonstrate overexpression of HA-tagged dCasRx-ALKBH5 (WT and H204A) by plasmid transfection with an antibody detecting HA.

Actin is probed as a loading control. **(C)** Representative immunofluorescence images of A549 cells transfected with dCasRx-ALKBH5 (WT and H204A) plasmids. Scale bars, 10  $\mu$ m. **(D)** SELECT analysis of *MYC A*<sup>5553</sup> in A549 cells. **(E)** SELECT analyses of *MYC A*<sup>5553</sup> in A549 cells stably expressing dCasRx-ALKBH5 with sgRNAs targeting 7SK and the control cells.

**Supplementary Figure S4. 7SK-targeting dCasRx-ALKBH5 specifically modulates m<sup>6</sup>A-7SK, related to Figure 4.** Scatter plots of transcriptome-wide relative m<sup>6</sup>A modifications [ $\log_2(\text{m}^6\text{A-IP}/\text{input})$ ] in three engineered A549 cells expressing dCasRx-ALKBH5, detected by MeRIP-seq. Comparison was made between every two cell lines. Red dots indicate 7SK.

**Supplementary Figure S5. Breakdown of U-C mutations in nascent RNA-seq, related to Figure 5.** **(A)** Pie chart illustrating the average percentage of mutations among all the nascent RNA-seq reads ranging from 0 to 8+ U to C mutations. **(B)** Histogram profile showing normalized exon reads distribution for 0-7 U to C mutations. Track example of 0 mutation reads (blue) or 2-7 mutations reads (red) mapped *INTS1* **(C)** and *SCAMP3* **(D)** in the control A549 cell line (dCasRx-ALKBH5+sgRNA NT). **(E)** Comparison of steady state RNA levels (0 mutation reads) across a region on chromosome 1 as shown in Figure 5F.

**Supplementary Figure S6. m<sup>6</sup>A affects 7SK snRNP composition and genome-wide Pol II distribution, related to Figure 6**

Northern blot analyses of 7SK and tRNA<sup>lys</sup> from RIP experiments performed using a MePCE **(A)** or LARP7 **(B)** antibody compared with control IgG. Western blots show the IP efficiency of targeted proteins. Inputs (I) are 5% of the pellet (P). The low-salt fraction (LSF) and high-salt fraction (HSF) prepared from engineered A549 cell lines **(C)** and MRC5 cell **(D)** were subjected to western blot analysis and probed with the indicated antibodies. **(E)** MeRIP and RT-qPCR measurement of 7SK in A549 cells with or without HMBA treatment. **(F)** Heatmaps of Pol II (ChIP relative to input) occupancy in A549 cells upon dCasRx-ALKBH5 and sgRNA expression, centered at the TSS (-1 kb to TES+3 kb). **(G)** Metagene profiles of Pol II ChIP performed in the three A549 cell lines as in F, showing the distribution of Pol II and the traveling ratio. **(H)** Track examples of Pol II ChIP-seq in the region spanning genes *IREB2*, *HYYK* and *PSMA4* in three A549 cell lines as in F. Error bars represent SD; *t*-test statistic is used, \* *P*<0.05.

**Supplementary Figure S7. SHAPE-MaP analysis of 7SK in A549 cells with or without perturbation of m<sup>6</sup>A status, related to Figure 7.** **(A-F)** Each condition is shown in duplicate, as

labeled. The nucleotides and numbering across the x axis correspond to the reference sequence NR\_001445. Highly reactive nucleotides are colored in red, medium in orange and low in black. Regions that do not contain structural information due to primer binding sites (nt 1-18, 319-332) are shaded in grey. Error bars indicate standard deviation. **(G)** 7SK consensus structure annotated with SHAPE-MaP reactivity. High reactivity positions are shown in red, medium in orange and low are white. Terminal regions without information due to primer binding sites are depicted in grey. The arrowheads show changes in reactivity upon reduction of m<sup>6</sup>A levels in 7SK, comparing cells expressing dCasRx-ALKBH5 + sgRNA 7SK to cells expressing dCasRx-ALKBH5 + sgRNA NT, with the colors (cyan and black) representing two replicate experiments. Filled arrowheads indicate positions that become more reactive when m<sup>6</sup>A is decreased while open arrowheads mark positions that are less reactive. The m<sup>6</sup>A sites confirmed by the SELECT assay are marked with a red circle (m<sup>6</sup>). **(H)** Schematic of biotinylated 7SK SLI (30-80nt) with and without m<sup>6</sup>A modification. **(I)** Western blot analyses of proteins enriched by 7SK SLI with or without m<sup>6</sup>A modification from A549 cell lysate.

## Supplementary Tables

**Table S1. RT-qPCR sequences used in this study, related to STAR Methods.**

| gene            | Sequence 5' - 3'         |
|-----------------|--------------------------|
| ALKBH5 forward  | CGGCGAAGGCTACACTTACG     |
| ALKBH5 reverse  | CCACCAGCTTTTGGATCACCA    |
| METTL3 forward  | TTGTCTCCAACCTTCCGTAGT    |
| METTL3 reverse  | CCAGATCAGAGAGGTGGTGTAG   |
| METTL16 forward | CTCTGACGTGTA CTCTCCTAAGG |
| METTL16 reverse | TACCAGCCATTCAAGGTTGCT    |
| FTO forward     | ACTTGGCTCCCTTATCTGACC    |
| FTO reverse     | TGTGCAGTGTGAGAAAGGCTT    |
| RCN2 forward    | TGGA CT CAGATGGCTTTCTCA  |
| RCN2 reverse    | GACCTGAATCCTGGTTAGCTTTT  |
| 7SK forward     | GCGATCTGGCTGCGACAT       |
| 7SK reverse     | TCCTCTTCGACCGAGCGC       |
| Actin forward   | CCAACCGCGAGAAGATGA       |
| Actin reverse   | CCAGAGGCGTACAGGGATAG     |
| U6 forward      | GTGCTCGCTTCGGCAGC        |
| U6 reverse      | AAAATATGGAACGCTTCACGAAT  |

**Table S2. Northern blot probe sequences used in this study, related to STAR Methods.**

| Name  | Sequence 5' - 3'                                                                                                                                                                                                                                                                                                                                                                                                                                                             |
|-------|------------------------------------------------------------------------------------------------------------------------------------------------------------------------------------------------------------------------------------------------------------------------------------------------------------------------------------------------------------------------------------------------------------------------------------------------------------------------------|
| 7SK   | AAAAGAAAGGCAGACUGCCACAUGCAGCGCCUCAUUUGGAUGUGUCUGGAG<br>UCUUGGAAGCUUGACUACCCUACGUUCUCCUACAAAUGGACCUUGAGAGCUU<br>GUUUGGAGGUUCUAGCAGGGGAGCGCAGCUACUCGUAUACCCUUGACCGAA<br>GACCGGUCCUCCUCUAUCGGGGGAUGGUCGUCCUCUUCGACCGAGCGCGCAG<br>CUUCGGGAGGGACGCACAUGGAGCGGUGAGGGAGGAAGGGGACACCCGCCU<br>AGCCAGCCAGAUCAGCCGAAUCAACCCUGGCCGAUCAAUUGGGGUGACAGAUG<br>UCGCAGCCAGAUCGCCUCACAUC (in vitro transcribed antisense 7SK, with Us<br>possibly containing azide modification <sup>92</sup> ) |
| U6    | GCAGGGGCCATGCTAATCTTCTCTGTATCGT/3AzideN/                                                                                                                                                                                                                                                                                                                                                                                                                                     |
| sgRNA | /5IRD800/GTTTCAAACCCCGACCAGTTGGTA                                                                                                                                                                                                                                                                                                                                                                                                                                            |
| tRNA  | CTCATGCTCTACCGACTGAGCTAGCCGGGCA/3AzideN/                                                                                                                                                                                                                                                                                                                                                                                                                                     |

**Table S3. siRNA sequences produced from the shRNAs, related to STAR Methods.**

| Name            | Sequence 5' - 3'      |
|-----------------|-----------------------|
| ALKBH5 shRNA#1  | CCACCCAGCUAUGCUUCAGAU |
| ALKBH5 shRNA#2  | CCUCAGGAAGACAAGAUUAGA |
| METTL3 shRNA#1  | GCAAGUAUGUUCACUAUGAAA |
| METTL3 shRNA#2  | GCCAAGGAACAAUCCAUGUU  |
| METTL16 shRNA#1 | GUUUGUUAUGAGGUGGAGUUU |
| METTL16 shRNA#2 | CAUCUGAAGUAGAGCUUGUUU |
| FTO shRNA#1     | UCACCAAGGAGACUGCUAUUU |
| FTO shRNA#2     | CGGUUCACAACCUCGGUUUAG |

**Table S4. SELECT primer sequences, related to STAR Methods.**

| name                  | Sequence 5' - 3'                                |
|-----------------------|-------------------------------------------------|
| qPCR-F for SELECT     | ATGCAGCGACTCAGCCTCTG                            |
| qPCR-R for SELECT     | TAGCCAGTACCGTAGTGCGTG                           |
| MYC A5553 target UP   | tagccagtaccgtagtgcgtgGATTGCTCAGGACATTTCTG       |
| MYC A5553 target DOWN | /5phos/TAGAAGGAATCGTTTTCTTcagaggctgagtcgctgcat  |
| MYC control UP        | tagccagtaccgtagtgcgtgATAGGTGATTGCTCAGGACA       |
| MYC control DOWN      | 5phos/TTCTGTTAGAAGGAATCGTTcagaggctgagtcgctgcat  |
| 7SK A43 target UP     | tagccagtaccgtagtgcgtgAGCCGAATCAACCCTGGCGA       |
| 7SK A43 target DOWN   | /5Phos/CAATGGGGTGACAGATGTCGcagaggctgagtcgctgcat |
| C45 ctrl UP           | tagccagtaccgtagtgcgtgTCAGCCGAATCAACCCTGGC       |
| C45 ctrl DOWN         | /5Phos/ATCAATGGGGTGACAGATGTcagaggctgagtcgctgcat |
| A56 target UP         | tagccagtaccgtagtgcgtgAGCCAGCCAGATCAGCCGAA       |
| A56 target DOWN       | /5phos/CAACCCTGGCGATCAATGGGcagaggctgagtcgctgcat |
| U58 ctrl UP           | tagccagtaccgtagtgcgtgCTAGCCAGCCAGATCAGCCG       |
| U58 ctrl DOWN         | /5phos/ATCAACCCTGGCGATCAATGcagaggctgagtcgctgcat |
| A65 target UP         | tagccagtaccgtagtgcgtgCACCCGCCTAGCCAGCCAGA       |
| A65 target DOWN       | /5phos/CAGCCGAATCAACCCTGGCGcagaggctgagtcgctgcat |
| C67 ctrl UP           | tagccagtaccgtagtgcgtgGACACCCGCCTAGCCAGCCA       |
| C67 ctrl DOWN         | /5phos/ATCAGCCGAATCAACCCTGGcagaggctgagtcgctgcat |
| A172 target UP        | tagccagtaccgtagtgcgtgTACCCTTGACCGAAGACCGG       |
| A172 target DOWN      | /5Phos/CCTCCTCTATCGGGGATGGTcagaggctgagtcgctgcat |
| C174 ctrl UP          | tagccagtaccgtagtgcgtgTATACCCTTGACCGAAGACC       |
| C174 ctrl DOWN        | /5Phos/GTCCTCCTCTATCGGGGATGcagaggctgagtcgctgcat |

|                  |                                                   |
|------------------|---------------------------------------------------|
|                  | gcat                                              |
| A186 target UP   | tagccagtaccgtagtgcggtgCGCAGCTACTCGTATACCCT        |
| A186 target DOWN | /5phos/GACCGAAGACCGGTCCTCCTcagaggctgagtcgctgcat   |
| G188 ctrl UP     | tagccagtaccgtagtgcggtgAGCGCAGCTACTCGTATACC        |
| G188 ctrl DOWN   | /5phos/TTGACCGAAGACCGGTCCTCCTcagaggctgagtcgctgcat |
| A220 target UP   | tagccagtaccgtagtgcggtgCTTGAGAGCTTGTTTGGAGG        |
| A220 target DOWN | /5Phos/TCTAGCAGGGGAGCGCAGCTcagaggctgagtcgctgcat   |
| A228 target UP   | tagccagtaccgtagtgcggtgAAATGGACCTTGAGAGCTTG        |
| A228 target DOWN | /5Phos/TTGGAGGTTCTAGCAGGGGAcagaggctgagtcgctgcat   |
| C222 ctrl UP     | tagccagtaccgtagtgcggtgACCTTGAGAGCTTGTTTGGGA       |
| C222 ctrl DOWN   | /5Phos/GTTCTAGCAGGGGAGCGCAGcagaggctgagtcgctgcat   |
| A230 target UP   | tagccagtaccgtagtgcggtgACAAATGGACCTTGAGAGCT        |
| A230 target DOWN | /5phos/GTTTGGAGGTTCTAGCAGGGcagaggctgagtcgctgcat   |
| A231 target UP   | tagccagtaccgtagtgcggtgTACAAATGGACCTTGAGAGC        |
| A231 target DOWN | /5phos/TGTTTGGAGGTTCTAGCAGGcagaggctgagtcgctgcat   |
| G232 ctrl UP     | tagccagtaccgtagtgcggtgCTACAAATGGACCTTGAGAG        |
| G232 ctrl DOWN   | /5phos/TTGTTTGGAGGTTCTAGCAGcagaggctgagtcgctgcat   |
| A238 target UP   | tagccagtaccgtagtgcggtgGTTCTCCTACAAATGGACCT        |
| A238 target DOWN | /5phos/GAGAGCTTGTTTGGAGGTTcagaggctgagtcgctgcat    |
| A239 target UP   | tagccagtaccgtagtgcggtgCGTTCTCCTACAAATGGACC        |
| A239 target DOWN | /5phos/TGAGAGCTTGTTTGGAGGTTcagaggctgagtcgctgcat   |
| A245 target UP   | tagccagtaccgtagtgcggtgACCCTACGTTCTCCTACAAA        |
| A245 target DOWN | /5phos/GGACCTTGAGAGCTTGTTTgagaggctgagtcgctgcat    |

|                  |                                                         |
|------------------|---------------------------------------------------------|
|                  | gcat                                                    |
| G240 ctrl UP     | tagccagtaccgtagtgcgtgACGTTCTCCTACAAATGGAC               |
| G240 ctrl DOWN   | 5phos/TTGAGAGCTTGTTTGGAGGTcagaggctgagtcgct<br>gcat      |
| A257 target UP   | tagccagtaccgtagtgcgtgGGAAGCTTGACTIONACCCTACG            |
| A257 target DOWN | /5Phos/TCTCCTACAAATGGACCTTGcagaggctgagtcgct<br>gcat     |
| G259 ctrl UP     | tagccagtaccgtagtgcgtgTTGGAAGCTTGACTIONACCCTA            |
| G259 ctrl DOWN   | /5Phos/GTTCTCCTACAAATGGACCTcagaggctgagtcgct<br>gcat     |
| A281 target UP   | tagccagtaccgtagtgcgtgTCATTTGGATGTGTCTGGAG               |
| A281 target DOWN | /5Phos/CTTGGGAAGCTTGACTIONACCCTcagaggctgagtcgct<br>gcat |
| A288 target UP   | tagccagtaccgtagtgcgtgCAGCGCCTCATTTGGATGTG               |
| A288 target DOWN | /5Phos/CTGGAGTCTTGGGAAGCTTGAcagaggctgagtcgc<br>tgcgcat  |
| T283 ctrl UP     | tagccagtaccgtagtgcgtgCCTCATTTGGATGTGTCTGG               |
| T283 ctrl DOWN   | /5Phos/GTCTTGGGAAGCTTGACTIONACCcagaggctgagtcgct<br>gcat |



**Table S5. DNA oligonucleotides for RNase H assay, related to STAR Methods.**

| Name     | sequence 5' - 3'                |
|----------|---------------------------------|
| NT       | GATGAAAGCTGGCTACAGGAAGGCCAGACG  |
| region 1 | TGGCGATCAATGGGGTGACAGATGTTCGACG |
| region 2 | CCGAATCAACCCTGGCGATCAATGGGGTGA  |
| region 3 | CATTTGGATGTGTCTGGAGTCTTGGAAGCT  |
| region 4 | TGTGTCTGGAGTCTTGGAAGCTTGACTACC  |
| region 5 | CGCAGCTACTCGTATACCCTTGACCGAAGA  |
| region 6 | CGTATACCCTTGACCGAAGACCGGTCCTCC  |

**Table S6. 7SK SLI sequences for *in vitro* binding assay, related to STAR Methods.**

| Oligos name                  | SLI (30-80nt) 5' - 3'                                                                                   |
|------------------------------|---------------------------------------------------------------------------------------------------------|
| 7SK with m <sup>6</sup> A    | Biotin-UGUCACCCCAUUGm <sup>6</sup> AUCGCCAGGGUUGm <sup>6</sup> AUUCGGCUGm <sup>6</sup> AUCUGGCUGGCUAGGC |
| 7SK without m <sup>6</sup> A | Biotin-UGUCACCCCAUUGAUCGCCAGGGUUGAUUCGGCUGAUCUGGCU GGCUAGGC                                             |

**Table S7. Primer sequences for SHAPE-Map library construction, related to STAR Methods.**

| Primer name | Sequence 5' - 3'                                                        |
|-------------|-------------------------------------------------------------------------|
| 7SK-RT      | AAAAGAAAGGCAGACTGCCAC                                                   |
| Step1-F1    | GTGACTGGAGTTCCTTGGCACCCGAGAATTCCANNNNNGGAT<br>GTGAGGGCGATCTG            |
| Step1-R1    | CCCTACACGACGCTCTTCCGATCTNNNNNAAAAGAAAGGCAGACTGCCA<br>CATG               |
| Step2-F     | CAAGCAGAAGACGGCATAACGAGAT[barcode]GTGACTGGAGTTCCTTGGC<br>ACCCGAGAATTCCA |
| Step2-R     | AATGATACGGCGACCACCGAGATCTACACTCTTCCCTACACGACGCTCTT<br>CCG               |
